1           **Generalized locomotion of brittle stars with an arbitrary number of arms**

2

3                           Daiki Wakita<sup>1</sup>, Katsushi Kagaya<sup>2,3</sup>, Hitoshi Aonuma<sup>1,4\*</sup>

4           <sup>1</sup>Graduate School of Life Science; Hokkaido University; Sapporo, Hokkaido, 060-0810;  
5           Japan

6           <sup>2</sup>The Hakubi Center for Advanced Research; Kyoto University; Yoshida-Konoe, Kyoto,  
7           606-8501; Japan

8           <sup>3</sup>Seto Marine Biological Laboratory, Field Science, Education and Research Center;  
9           Kyoto University; Shirahama, Wakayama, 649-2211; Japan

10          <sup>4</sup>Research Institute for Electronic Science; Hokkaido University; Sapporo, Hokkaido,  
11          060-0812; Japan

12

13          \*Correspondence to Hitoshi Aonuma, who serves as the Lead Contact for this paper.

14          Research Center of Mathematics for Social Creativity, Research Institute for Electronic  
15          Science, Hokkaido University, Sapporo 060-0812, Japan.

16          Tel/Fax: +81-11-706-3832, Email: aon@es.hokudai.ac.jp

17

18

### Abstract

19 Typical brittle stars creep on the ground with five arms. However, some species of them  
20 show individual difference in the number of arms: commonly five or six, rarely four or  
21 seven. We found this trait unique since intact legged animals each own a fixed number  
22 of limbs in general. How does a single species manage different numbers of motile  
23 organs to realize adaptive locomotion? We aim to describe four- to seven-armed  
24 locomotion to explore a common rule across different arm numbers in brittle stars.  
25 Gathering several quantitative indices obtained from *Ophiactis brachyaspis*, we figured  
26 out an average locomotion where a front position emerges at one of the second  
27 neighboring arms to a mechanically stimulated arm, while side arms adjacent to the  
28 front synchronously work as left and right rowers, regardless of the number of arms.  
29 This idea would generalize how ‘left and right’ emerges in a radially symmetrical body.

30

31

## Introduction

32

33 Legged animals utilize appendages to move around on the ground. In most cases, intact  
34 adults of each species have a constant number of motile organs, such as four in many  
35 mammals and six in most insects. Supposedly, each species adopts a number-specific  
36 mechanism of locomotion. In this context, some species of brittle stars (Echinodermata:  
37 Ophiuroidea) exhibit an appealing individual difference, where some intact individuals  
38 have five appendages or less, while others have six or more (Figure S1). This difference  
39 in number is usually found in fissiparous species, which undergo asexual reproduction  
40 by fission and regeneration [1–3].

41 As typical echinoderms show pentaradial symmetry, most ophiuroid species  
42 standardly have five multi-jointed appendages called “arms,” which extend from the  
43 “disk” at the center. Previous studies have described arm movements in the locomotion  
44 of five-armed species in qualitative terms [4–10] as well as in quantitative terms [11,  
45 12]. Several locomotor modes have been known even in a single species. An often  
46 reported mode, referred to as “breast stroke” [8, 9] or “rowing” [11], is characterized by  
47 a leading arm facing forward, two side arms working as left and right rowers, and two  
48 back arms dragged passively [4, 5, 7–9, 11, 12]. Some studies have observed another  
49 locomotor mode, called as “paddling” [8] or “reverse rowing” [11], where a backmost  
50 arm is dragged while the other four actively row [5–8, 11]. The ophiuroid body creeps  
51 in a certain direction with such bilaterally coordinated manners [11]. Since the ‘role’ of  
52 each arm switches when the body changes moving direction [11], brittle stars do not  
53 have consistent antero-posterior and left-right axes in behavior.

54 Although the five-armed locomotion in common brittle stars and the individual  
55 difference in specific species have been viewed in different contexts, none has  
56 combined them to spotlight ophiuroid locomotion under the different numbers of arms.  
57 Referring to the human body, whether the body comprises five, six, or other numbers of  
58 modules seems to bring a huge issue in individual function. How do these animals  
59 manage the difference in the number of motile organs to realize adaptive locomotion  
60 within a species? The aim of our study is to quantitatively describe the four-, five-, six-,  
61 and seven-armed locomotion in the intact individual of an ophiuroid species, *Ophiactis*  
62 *brachyaspis* Clark, 1911 (Figure S1), to explore a common rule across different arm

63 numbers. Figuring out a control law which is flexible with the number of limbs, we  
64 would understand what sorts of body structure and interaction are of great or little  
65 importance to adaptive movements, and further apply such capacity in nature to a more  
66 flexible design in robotics. We will also provide a general scheme of how ‘left and  
67 right’—‘front and back’ in the same time—emerges in a multidirectional body with an  
68 arbitrary number of rays to make a unidirectional behavior. Since this study addresses a  
69 generalized description in many-sided aspects, we take the approach of “exploratory  
70 data analysis” [13, 14] with Bayesian statistical modeling, less weighting confirmation  
71 of a fixed hypothesis. One conclusion through our study is that a mechanical stimulus to  
72 an arm averagely makes one of its *second* neighboring arms be a leading arm, with the  
73 leader’s side arms working as left and right synchronous rowers. Thus regardless of the  
74 total number of arms, ophiuroid locomotion shows a common anterior pattern, which  
75 could be positioned by counting how many arms some signal passes along a circular  
76 pathway.

77

78

79

## Results

80

### 81 Moving direction ( $\theta$ )

82 The measured data of the post-stimulus moving direction  $\theta$  (Figures S2, S3; Equation 1  
83 in Materials and Methods) are shown in Figure 1 by dot plots. For all the four-, five-,  
84 six-, and seven-armed cases, the model assuming a mixture of two von Mises  
85 distributions in  $\theta$  yielded smaller WAICs—better predictabilities—than that assuming a  
86 single distribution (Table 1). Compared with the small  $\Delta$  (difference from the best one;  
87 Equation 12 in Materials and Methods) of the one-distribution model in four- and five-  
88 armed animals, the six- and seven-armed  $\Delta$  values were larger enough to interpret that  
89 bimodality was more obvious in more arms. Following the better model in terms of  
90 WAIC, we hereafter show the results on the assumption of two distributions for all the  
91 cases.

92 The posterior medians of two distributions’ means, which were calculated  
93 separately for the negative and positive ranges, were  $\pm 17$ ,  $\pm 29$ ,  $\pm 46$ , and  $\pm 70$  in four- to  
94 seven-armed animals, respectively. These estimated values signify that the more arms a

95 brittle star had, the further two distributions of  $\Theta$  were apart from each other (Figure 1).  
96 In other words, the average moving direction of individuals with more arms was more  
97 angled from the opposite direction of the stimulated arm. Predictive distribution of  $\Theta$   
98 indeed depicted this trend (Figure 1).

99

#### 100 **Left or right rower ( $B_\alpha$ )**

101 The measured data of  $B_\alpha$ —the  $\alpha$ -th arm's degree of being a left or right rower (Figures  
102 S2, S3; Equation 3 in Materials and Methods)—are schematized trial-by-trial in Figures  
103 S1–S4. As for the five- and six-armed populations, no-individuality models consistently  
104 took smaller WAICs than their counterparts where individuality was assigned to the  
105 mean of  $B_\alpha$  (Table 1). We thus avoid mentioning individual difference within the same  
106 arm number.

107         Among  $L_\alpha$ ,  $S$ ,  $\Theta$ ,  $\Theta_{\text{sign}}$ , and  $F_\alpha$ , the five-armed  $B_\alpha$  was better explained by the  
108 continuous moving direction  $\Theta$ , whereas the six- and seven-armed cases rather  
109 emphasized its sign  $\Theta_{\text{sign}}$  (Equation 2 in Materials and Methods) in discrete terms (Table  
110 1). In four arms, the arm length  $L_\alpha$  was chosen for a best explanatory variable although  
111  $\Theta$  showed a close performance. Given the dominance of the moving direction indicators  
112 as well as  $\Theta$ 's bimodality (Figure 1), we present the data of  $B_\alpha$  separately by  $\Theta_{\text{sign}}$ —in  
113 which side moving direction angled from the midline of the stimulated arm. Two groups  
114 were here defined by whether it angled clockwise ( $\Theta_{\text{sign}} = 0$ ) or anticlockwise ( $\Theta_{\text{sign}} = 1$ ).

115         The  $\Theta_{\text{sign}}$ -based grouping exhibited a common locomotor mode among four-,  
116 five-, six-, and seven-armed animals in regards to  $B_\alpha$ 's posterior means. The directional  
117 property of each arm could be explained by how many arms we count from the  
118 stimulated arm. Primarily, one of the *first* neighboring arms to the stimulated arm  
119 consistently took the largest or second largest  $|B_\alpha|$ —absolute values of posterior means  
120 (Figures 2–5A,C). This *first* arm corresponds to the anticlockwise neighbor of the arm 1  
121 when  $\Theta_{\text{sign}} = 0$  (Figures 2–5A) and the clockwise one when  $\Theta_{\text{sign}} = 1$  (Figures 2–5C). In  
122 the next place, the *second* neighbor from the stimulus—next to the *first* in the same  
123 detour—took the smallest or second smallest  $|B_\alpha|$ . Then, the *third* neighbor of the  
124 stimulus—next to the *second*—took the largest or second largest  $|B_\alpha|$  which was  
125 opposite in sign to that of the *first*. One exception was the seven-armed case when  $\Theta_{\text{sign}}$   
126 = 0 (Figure 5A); the *second* (arm 3) and the *third* (arm 4) respectively had the fourth

127 smallest and the third largest, probably due to the outlying trial shown at the row 1 of  
128 column 4 in Figure S7. Replacing the ordinary cases' values with actual movements, the  
129 *first* actively pushed in the direction of the stimulated arm, while the *third* actively  
130 pushed oppositely to the *first*. These movements could make the *second* face forward,  
131 which indeed corresponded to the ranges of  $\Theta$  in all the cases (Figures 2–5A,C; see also  
132 Videos S1, S2).

133

### 134 **Synchronization between two arms ( $E_{\alpha\beta}$ )**

135 The higher explanatory power of  $\Theta_{\text{sign}}$  could also apply to the instance of the degree of  
136 synchronization between the  $\alpha$ - and  $\beta$ -th arms,  $E_{\alpha\beta}$  (Equation 4 in Materials and  
137 Methods), because five-, six-, and seven-armed animals each brought the smallest  
138 WAIC in the model assuming  $\Theta_{\text{sign}}$ 's effect (Table 1). In the four-armed case, the model  
139 without an explanatory variable best performed while the presence of  $\Theta$  or  $\Theta_{\text{sign}}$  resulted  
140 in similar predictabilities. Accenting the significance of  $\Theta_{\text{sign}}$  as with  $B_\alpha$ 's situation, we  
141 here show the resultant values of  $E_{\alpha\beta}$  discretely by the sign of  $\Theta$ .

142 A side-by-side comparison with the  $\Theta_{\text{sign}}$ -based results of  $B_\alpha$  shows us that the  
143 pair of the *first* and *third* rowers counting from the stimulus had the negatively largest  
144 medians of  $E_{\alpha\beta}$ 's posterior means in most cases (Figures 2–5B,D). Although one  
145 exception was found in the seven-armed with  $\Theta_{\text{sign}} = 0$ , the pair's value  $E_{24}$  leaned  
146 negatively as well (Figure 5B). These values gave a quantitative indication that these  
147 two arms tended to simultaneously push in the opposite direction, regardless of the  
148 number of arms.

149

150

## 151 **Discussion**

152

153 Our study newly described the locomotion of brittle stars in a comparative context of  
154 four-, five-, six-, and seven-armed intact individuals in a single species. For this purpose,  
155 not stereotyping a discrete role of each arm, we introduced a quantitative index which  
156 can visualize each arm's degree of being a left or right rower, namely  $B_\alpha$ . Coupled with  
157 other supportive values, this assessment would bring a unique idea of how 'left and  
158 right' emerges in the locomotion of a radially symmetrical animal (Figure 6).

159

## 160 **Locomotor modes**

161 In past quantitative studies using five-armed brittle stars, antiphase synchronization of  
162 two distant arms has been supported by assessing the stop and start timing of arm  
163 movements [11] and by evaluating  $E_{\alpha\beta}$  as in our study [12]. This locomotor mode,  
164 which is referred to as “breast stroke” or “rowing,” is characterized by a leading arm  
165 and its side rowing arms [4, 5, 7–12]. Our study figured out that the triplet of left-front-  
166 right could appear even in four-, six-, and seven-armed individuals, suggesting that this  
167 locomotor mode is determined anteriorly, not laterally or posteriorly. In addition, the  
168 two back arms in the five-armed locomotor mode have been often interpreted as  
169 passively dragged ones [4, 5, 8, 9, 15]; nevertheless, our study showed that these arms  
170 rather worked as weaker rowers since their values of  $B_{\alpha}$  ranged either negatively or  
171 positively (Figure 2A,C). In six- and seven-armed ophiuroids, back arms following the  
172 two strong rowers similarly exhibited a trend of rowers, whereas the backmost ones  
173 were usually neutral as to the leftward or rightward bias just like the leading arm  
174 (Figures 3A,C, 5A,C). Thus more arms could take charge of ‘rowers’ especially when a  
175 brittle star has more arms.

176 Although “breast stroke” or “rowing” is a frequently reported locomotor mode  
177 in five-armed brittle stars, some studies have also described patterns where there is no  
178 leading arm. One is called as “paddling” or “reverse rowing,” where a backmost arm is  
179 dragged while the other four actively row [5–8, 11]. Such patterns without leading arms  
180 have been observed in free movement without experimental stimuli [8, 11] as well as in  
181 escape behavior for a short time [16]. In our study using *Ophiactis brachyaspis*, each  
182 trial seldom showed such a non-leading pattern (Figures S1–S4). Assuming this brittle  
183 star actually switches different locomotor modes, non-leading patterns might be  
184 employed only for several seconds after stimuli. In this case, our study might overlook  
185 or underestimate this urgent phase since we evenly analyzed one-minute duration after  
186 the beginning of the disk’s movement. In either case, as far as post-stimulus locomotion  
187 was quantified for the fixed period, it seems the locomotor mode with a leading arm is  
188 more usual in the intact individuals of the *Ophiactis* species regardless of how many  
189 arms they have.

190

191 **Decision of moving direction**

192 Since brittle stars show no consistent front in behavioral terms as in most echinoderms,  
193 every arm can be a leading arm. Astley (2012) described their turning behavior in a  
194 short-term series, which was made by changing the roles of arms, not by rotating their  
195 body axis. As to an escape situation, several studies have observed that brittle stars  
196 avoid open or bright spaces [17, 18], a predator extract [16], and a KCl solution [10].  
197 However, few have probed into how such repellents make a certain reaction per arm to  
198 decide the moving direction of a whole individual. Since light and liquid diffuse in  
199 water, it is difficult to stimulate only a single target arm. Especially for small brittle  
200 stars such as *Ophiactis* species, mechanical stimuli would perform better with the aim to  
201 understand how signals from a stimulated arm affect the movements of the other arms.

202 In our study, two quantitative indices calculated from the filtered angular  
203 velocity of arms— $B_\alpha$  and  $E_{\alpha\beta}$ —and one obtained from the original coordinate data—  
204  $\Theta$ —could together visualize the ophiuroid locomotion without contradiction (Figures 2–  
205 5). Postulating each average of the two  $\Theta_{\text{sign}}$ -based patterns as a representative, our  
206 numerical results suggest the most frequent locomotion pattern after a mechanical  
207 stimulus, in which a leading arm emerges at the *second* neighbor of a stimulated arm  
208 while side arms adjacent to the leader synchronously push backward. To realize this  
209 bilateral distribution with a high probability, it can be assumed that an afferent signal  
210 from an arm makes one of the *first* neighboring arms be an active rower which pushes  
211 in the direction of the signaling arm, the *second* neighboring arm be an inactive one  
212 which has a less directional preference, and the *third* neighboring arm be another active  
213 one which pushes synchronously but oppositely to the *first*'s pushing (Figure 6).  
214 Accordingly, the *second* faces forward while the *first*, *third*, and some rear arms work  
215 on its both sides. In this model, whether the clockwise or anticlockwise *second* arm  
216 becomes a leading arm depends on in which detour the signal dominantly transfers from  
217 the stimulated arm, which is determined by some perturbation.

218 Under our model shown in Figure 6, brittle stars with more arms would have a  
219 more risk of ‘escape to stimulus.’ If the front is placed ideally around the *second*  
220 neighboring arm from the stimulus, four-, five-, six-, and seven-armed animals will  
221 respectively show 0, 36, 60, and 77 deg in average  $|\Theta|$ . In fact, the estimation from  
222 measured data copied it reasonably—17, 29, 46, and 70 deg, respectively—, and trials



223 where moving direction rather inclined toward the stimulated arm ( $90 < |\theta| \leq 180$ ) were  
224 more frequent as a body had more arms: 0/15, 1/30, 3/30, and 5/15, respectively (Figure  
225 1). Although the ‘escape to stimulus’ behavior is considered less adaptive, an  
226 evolutionary background would explain it. It has been proposed that primitive  
227 ophiuroids showed pentaradial symmetry [19, 20], implying that brittle stars had  
228 developed a locomotion mechanism which worked optimally for the five-armed body.  
229 Some exceptional individuals in arm number, at least the four-, six-, and seven-armed  
230 bodies, probably have kept following this initial plan without vital issues. Meanwhile,  
231 escaping direction could be more or less bent as a side effect, and the minority of four-  
232 and seven-armed ones might be a reflection of some inconvenience in control  
233 mechanism or its expression.

234 Our study has significance to understand how behavioral direction is expressed  
235 in a body without antero-posterior and left-right axes. Even when the individual body is  
236 round, some direction-making signal could transfer linearly at a local view (Figure 6),  
237 just like a wave on a string or neural transmission in the spinal cord. Suppose brittle  
238 stars use this strategy, it seems not important how many segments with identical  
239 function are counted in the pathway. Otherwise, animal species would never allow  
240 individual difference in the number of motile organs.

241

### 242 **Inter-arm interaction**

243 Even if arms’ function determines as represented in Figure 6, our study remains  
244 questions of what kind of interactions mediates such coordination. In neurological  
245 aspects, the ophiuroid nervous system principally comprises a circumoral nerve ring in  
246 the disk and radial nerve cords extending into each arm [21–25]. Some behavioral  
247 studies have supported the essential roles of the circumoral nerve ring in locomotion;  
248 menthol-anesthetic experiments indicated its function in initiating locomotion [18];  
249 nerve cut experiments have demonstrated its necessity for coordinating arms [8–10, 26,  
250 27]. For such cases, the inter-arm connection depicted in Figure 6 is recognizable as the  
251 circumoral nerve ring. We can assume that the movement of each arm directly reflects  
252 neural activity in each radially symmetrical sector, which could be explained even by a  
253 couple of neurons. For instance, ophiuroid locomotion would be a useful material for  
254 testing “neuron ring” models [28, 29] to know how circularly arranged neurons work in

255 the real world. Taking advantage of the unique individual difference in fissiparous  
256 brittle stars, we are able to demonstrate them with different neuron numbers as in  
257 computer, which would build a new bridge between theoretical biology and  
258 experimental biology.

259 Besides the crucial role of neural interactions, Kano et al. (2017) found the  
260 ophiuroid's ability to immediately change their locomotion patterns after the loss of  
261 certain numbers of arms, and then built an ophiuroid-like robot which imitated the  
262 adaptive locomotion via a local feedback without any preprogrammed control. Other  
263 robotics studies have also suggested the importance of physical interactions in  
264 movement coordination which is independent to electrical circuits [30, 31]. Taking  
265 account of these researches as well, it is not likely that four- to seven-armed individuals  
266 each employ a different central control system while counting the total number of arms.  
267 Each arm would just refer to the states of its neighboring arms to realize a coordinated  
268 pattern at an individual level, no matter how many arms they own. A trial-by-trial  
269 variability in moving direction and other indices (Figures S1–S4) might reflect the  
270 influence of physical properties such as arms' posture at each moment, although a  
271 circular neural network might dominantly design the average orientation, where the  
272 stimulated arm's *second* neighbor faces forward (Figure 6).

273 Such decentralized autonomous systems must contribute to the ophiuroid  
274 evolution that is flexible with the appendage number. It may be a reason why some  
275 species such as *Ophiactis brachyaspis* have acquired fissiparity, being capable of drastic  
276 morphological changes in a life cycle while retaining its locomotive ability.

277

278

## 279 **Materials and Methods**

280

### 281 **Animals**

282 We used the fissiparous brittle star *Ophiactis brachyaspis* (Figure S1). In nature, this  
283 species densely inhabits the upper and side surfaces of rough rocks or other adherent  
284 organisms such as sponges. Some of its arms lie in interstices while some rise from the  
285 substrate; suspension feeding ophiuroids show such a posture to capture particles [32].  
286 Animals collected in Shirahama Aquarium, Kyoto University, were reared in a

287 laboratory aquarium (600 × 600 × 600 mm) filled with artificial seawater at 25–28°C  
288 with the salinity of 32–35‰ (TetraMarin Salt Pro, Tetra Japan Co, Tokyo, Japan). Body  
289 size ranged 1.5–3.0 mm in disk diameter and 5–15 mm in arm length. The number of  
290 arms was six in the majority—about 70%—and five for the others. Four- and seven-  
291 armed bodies each were found only in one individual.

292

### 293 **Behavioral experiments**

294 To investigate locomotion, we chose 10 five-armed individuals and 10 six-armed  
295 individuals, in each of which the lengths of arms did not differ by more than twice (c.f.  
296 Figure S1). Four- and seven-armed individuals were also targeted; we obtained one for  
297 each. Each individual was put in a horizontal flat acrylic case (105 × 75 × 22 mm) filled  
298 with 100 mL of artificial seawater from the laboratory aquarium. There were no strong  
299 light gradient and no strong wind. Locomotion was recorded in aboral view using a  
300 digital camera (EOS8000D, Canon, Tokyo, Japan) with videos saved in MP4 format.  
301 We applied mechanical stimuli to arm tips using a toothpick. Stimulating an arm with  
302 subsequent observation was defined as one trial. The next trial came at the  
303 anticlockwise neighboring arm with an interval of more than two minutes. With  
304 repeating this rotation in order, every arm was stimulated at least three times for each  
305 individual.

306

### 307 **Measurements**

308 Per five- or six-armed individual, we analyzed three trials which showed the longest  
309 moving distances of the disk. In the four- and seven-armed cases, we picked out 15  
310 trials with the longest moving distances. Analyzed duration for each trial was one  
311 minute after beginning to move the disk following each stimulus (c.f. Videos S1, S2).  
312 The stimulated arm in each trial was numbered 1, which was followed anticlockwise by  
313 the other arms;  $\alpha$  is the index of arms ( $\alpha = 1, 2, 3, 4, 5$  in the five-armed instance). We  
314 tracked two coordinate points of the  $\alpha$ -th arm using a tracking software Kinovea ver.  
315 0.8.27 (<http://www.kinovea.org/>, accessed 4 December 2018) at 10 f.p.s.:  $P_\alpha(t) = (x_\alpha(t),$   
316  $y_\alpha(t))$ —the attachment point between the  $\alpha$ -th arm and the disk viewed aborally—and  
317  $P'_\alpha(t) = (x'_\alpha(t), y'_\alpha(t))$ —the point at half the length of the  $\alpha$ -th arm, in terms of the range  
318 from the center of disk to the arm tip—at the  $t$ -th frame (Figure S2). For the latter, we

319 did not choose each arm's tip because it often rose and showed casual movements  
320 seeming irrelevant to locomotion as Matsuzaka et al. (2017) indicated.  $P_{\text{cent}}(t)$  was  
321 defined as the center of gravity of all arms'  $P_{\alpha}(t)$  (Figure S2). The  $\alpha$ -th arm's length ( $L_{\alpha}$ )  
322 was defined as the maximum length of the segment  $P_{\alpha}(t)P'_{\alpha}(t)$  in the analyzed duration.  
323 Note that  $L_{\alpha}$  is a variable sampled in each trial, not accounting for the constant length of  
324 each arm. Moving distance ( $S$ ) was measured as the length of  $P_{\text{cent}}(1)P_{\text{cent}}(T)$ , where  $T$  is  
325 the total number of frames, i.e. 600 (Figure S2). We assessed moving direction ( $\theta$ ) as  
326 follows:

$$327 \quad \theta = \frac{1}{T} \sum_{t=1}^T (\theta(t)) \quad (1),$$

328 where  $\theta(t)$  is the angle made by the two segments  $P_c(1)P_c(T)$  and  $P_1(t)P_{\text{cent}}(t)$  (Figures  
329 S2, S3).  $\theta$ , which takes the range from  $-180$  to  $180$  deg, is  $0$  deg when the disk moves  
330 in the opposite direction of the stimulated arm. A negative or positive value of  $\theta$   
331 represents that the disk movement is angled clockwise or anticlockwise, respectively,  
332 from the opposite direction of the stimulated arm. For later uses in statistics, the dummy  
333 variable  $\theta_{\text{sign}}$  is defined as

$$334 \quad \theta_{\text{sign}} = \begin{cases} 0 & (-180 \leq \theta < 0) \\ 1 & (0 \leq \theta < 180) \end{cases} \quad (2).$$

335 The segment  $P_{\text{cent}}(t)P'_{\alpha}(t)$  during locomotion swung around  $P_{\text{cent}}(t)P_{\alpha}(t)$ , so the  
336  $\alpha$ -th arm's angle at the  $t$ -th frame ( $\varphi_{\alpha}(t)$ ) was defined as the angle made by these two  
337 segments (Figure S2).  $\varphi_{\alpha}(t)$  is negative or positive when  $P_{\text{cent}}(t)P'_{\alpha}(t)$  is angled  
338 clockwise or anticlockwise, respectively, from  $P_{\text{cent}}(t)P_{\alpha}(t)$ .  $\varphi_{\alpha}(t)$ 's angular velocity  
339 ( $\omega_{\alpha}(t)$ ) was calculated with a five-point moving average method, and then smoothed  
340 with a low-pass filter with the cutoff frequency of  $1.0$  Hz (Figure S3). To quantify to  
341 what extent each arm functions as left or right rower, we focused on that returning was  
342 faster than pushing in rowing arms. The filtered  $\omega_{\alpha}(t)$  was thus analyzed to evaluate the  
343 degree of a leftward or rightward bias in movement, which is represented by  $B_{\alpha}$  (named  
344 after "bias"; Figure S3):

$$345 \quad B_{\alpha} = \frac{1}{T} \sum_{t=1}^T \left( \omega_{\alpha}(t)^2 \text{sign}(\omega_{\alpha}(t)) \right) \quad (3).$$

346 Assuming that a directional bias results from a speed difference between pushing and  
347 returning in each arm, we can rephrase  $B_{\alpha}$  as the  $\alpha$ -th arm's degree of being a left or  
348 right rower. A largely negative value of  $B_{\alpha}$  represents that the  $\alpha$ -th arm moves clockwise

349 faster than anticlockwise, indicating that it slowly pushes leftward and fast returns  
350 rightward viewed proximally from the disk. On the contrary,  $B_\alpha$  is largely positive when  
351 the  $\alpha$ -th arm pushes rightward (clockwise). Its value is close to zero when the  $\alpha$ -th arm  
352 pushes leftward and rightward equally or is dragged without actively returning. We also  
353 extracted frequency components in the non-filtered  $\omega_\alpha(t)$  of each arm using Fourier  
354 transforms.  $F_\alpha$  was defined as the frequency at the peak amplitude in the  $\alpha$ -th arm.

355 Besides for  $B_\alpha$ , we used the filtered  $\omega_\alpha(t)$  to calculate Kano et al.'s (2017) “ $E_{ij}$ ,”  
356 namely, the degree of synchronization between two arms:

$$357 \quad E_{\alpha\beta} = \frac{1}{T} \sum_{t=1}^T \omega_\alpha(t) \omega_\beta(t) \quad (4).$$

358 A negative or positive value of  $E_{\alpha\beta}$  represents that the movements of the  $\alpha$ - and  $\beta$ -th  
359 arms synchronize in the opposite or same direction, respectively. A value around zero  
360 represents that the two arms move without strong correlation or are static.

361

## 362 **Statistical modeling**

363 We built statistical models for later comparative assessments with the following  
364 procedure. Firstly, to examine the structure of a possible bimodality in moving direction,  
365 we assume that  $\Theta$  is subjected to a single von Mises distribution ( $f_{\text{vM}}$ , ‘circular normal  
366 distribution’),

$$367 \quad \Theta[n] \sim f_{\text{vM}}(\mu_\Theta, \kappa_\Theta), \quad -\pi \leq \mu_\Theta \leq \pi, \quad \kappa_\Theta \geq 0 \quad (5)$$

368 or a mixture of two von Mises distributions,

$$369 \quad \Theta[n] \sim \frac{1}{2} f_{\text{vM}}(-\mu_\Theta, \kappa_\Theta) + \frac{1}{2} f_{\text{vM}}(\mu_\Theta, \kappa_\Theta), \quad -\pi \leq \mu_\Theta \leq \pi, \quad \kappa_\Theta \geq 0 \quad (6).$$

370 Hereafter,  $n$  takes one to the total number of trials, so that  $\Theta[n]$  denotes the  $n$ -th element  
371 of  $\Theta$ . The parameters as random variables  $\mu_\Theta$ —converted to radians for modeling—and  
372  $\kappa_\Theta$  are analogous to the mean and the reciprocal of variance, respectively, in normal  
373 distribution. For the mixed case, we assume that the two distributions are symmetrical  
374 to each other with respect to the position of 0 deg.

375 Secondly, to understand what brings a trial-by-trial variability of  $B_\alpha$ , we  
376 parametrize  $L_\alpha$ ,  $S$ ,  $\Theta$ ,  $\Theta_{\text{sign}}$ , and  $F_\alpha$  each as an explanatory variable for  $B_\alpha$ . We assume  
377 the normal distribution  $f_{\text{norm}}(\mu, \sigma)$ , where  $\mu$  and  $\sigma$  respectively represent the mean and  
378 standard deviation (s.d.), as follows:

$$379 \quad B_\alpha[n, \alpha] \sim f_{\text{norm}}(\mu_{\text{Bi}}[\alpha] + \mu_{\text{Bs}}[\alpha]X, \sigma_{\text{Bi}}[\alpha]), \quad \sigma_{\text{Bi}} \geq 0 \quad (7).$$

380 Here,  $\mu_{Bi}$ ,  $\mu_{Bs}$ , and  $\sigma_{Bi}$  are arm-by-arm parameters and  $X$  is an explanatory variable to  
 381 which  $L_\alpha[n, \alpha]$ ,  $S[n]$ ,  $\Theta[n]$ ,  $\Theta_{\text{sign}}[n]$ , or  $F_\alpha[n, \alpha]$  is assigned.  $S$ ,  $\Theta$ , and  $\Theta_{\text{sign}}$  are common  
 382 values for all the arms in the same trial. The categorical index  $\Theta_{\text{sign}}$  is to know whether  
 383  $B_\alpha$  varies continuously by  $\Theta$  or switches discretely by the sign of  $\Theta$ . In this instance,  $\mu_{Bs}$   
 384 represents the mean's difference between the negative and positive cases since this  
 385 variable disappears when  $\Theta_{\text{sign}}$  is zero ( $-180 \leq \Theta < 0$ ) and appears when  $\Theta_{\text{sign}}$  is one ( $0 \leq$   
 386  $\Theta < 180$ ). The model without the member  $\mu_{Bs}[\alpha]X$ , i.e. without an explanatory variable,  
 387 is for comparison. In parallel, let us consider whether  $B_\alpha$  is better explained by  
 388 individuality, namely, the quality made by some individual difference other than arm  
 389 number as to five- and six-armed animals. Consideration of individuality is given to the  
 390 mean's intercept  $\mu_{Bi}$ :

$$391 \quad \mu_{Bi}[i, \alpha] \sim f_{\text{norm}}(\mu_{B0}[\alpha], \sigma_{B0}), \sigma_{B0} \geq 0 \quad (8),$$

$$392 \quad B_\alpha[n, \alpha] \sim f_{\text{norm}}(\mu_{Bi}[i, \alpha] + \mu_{Bs}[\alpha]X, \sigma_{Bi}[\alpha]), \sigma_{Bi} \geq 0 \quad (9),$$

393 where  $i$  takes one to the total number of individuals (i.e. 10) and the hyperparameters  
 394  $\mu_{B0}$  and  $\sigma_{B0}$  are random variables. Let  $\sigma_{B0}$ , which is common in all arms, have a weakly  
 395 informative prior as

$$396 \quad \sigma_{B0} \sim f_t^+(3, 0, 20) \quad (10),$$

397 where  $f_t^+$  denotes the half  $t$  distribution and the parenthetical parameters represent the  
 398 degree of freedom ( $\nu$ ), location (mean when  $\nu > 1$ ), and scale (s.d. divided by  $\sqrt{3}$  when  $\nu$   
 399  $= 3$ ), respectively.

400 The final modeling is to examine which of  $\Theta$  and  $\Theta_{\text{sign}}$  is a better explanatory  
 401 variable for  $E_{\alpha\beta}$  in four- to seven-armed animals:

$$402 \quad E_{\alpha\beta}[n, p] \sim f_{\text{norm}}(\mu_{Ei}[p] + \mu_{Es}[p]X, \sigma_{Ei}[p]), \sigma_{Ei} \geq 0 \quad (11),$$

403 where  $\mu_{Ei}$ ,  $\mu_{Es}$ , and  $\sigma_{Ei}$  are pair-by-pair parameters and the explanatory variable  $X$  takes  
 404  $S[n]$ ,  $\Theta[n]$  or  $\Theta_{\text{sign}}[n]$ . Also considered is the model without the explanatory member  
 405  $\mu_{Es}[p]X$ .

406 Employing the Bayesian approach, posterior distribution of each parameter was  
 407 estimated by the no-U-turn sampler (NUTS) [33]—a variant of Hamiltonian Monte  
 408 Carlo (HMC) algorithm. In each sampling, we totally obtained 10,000 NUTS samples  
 409 from four Markov chains, in each of which every 40th generation was sampled in  
 410 100,000 iterations after a warmup of 5,000, with the target acceptance rate of 0.8.

411 Convergence of each parameter was checked by trace plots, the potential scale reduction  
412 factor  $\hat{R} \leq 1.1$ , and the effective sample size  $\hat{n}_{eff} \geq 40$ , i.e. at least 10 per chain [34].  
413 We assessed the predictability of the models based on WAIC [35, 36], as this criterion  
414 is applicable to our models containing mixed distributions (Equation 6) or hierarchical  
415 parameters (Equations 8, 9). We developed the resultant statements according to better  
416 predicting models, which yielded smaller WAICs than the others considered. For  
417 comparison between the models, we referred to the difference as

$$418 \quad \Delta = 2N(W - W_{\min}) \quad (12).$$

419  $N$  is the total number of measured samples; multiplication by  $2N$  is for the AIC scaling  
420 [34].  $W$  is a given model's WAIC while  $W_{\min}$  is the smallest WAIC among those of the  
421 proposed models, so that  $\Delta$  is zero in the best performed models. In presenting figures,  
422 the posterior predictive distributions of  $\Theta$  are shown based on the parameters' posterior  
423 distributions in a better performed model. To visualize  $B_\alpha$  and  $E_{\alpha\beta}$  dependent on a better  
424 explanatory variable, we obtained the median of each posterior distribution under a  
425 model including the explanatory variable not only in the mean but also in the s.d.;  
426 Equation 7 or 9 was modified to

$$427 \quad B_\alpha[n, \alpha] \sim f_{\text{norm}}(\mu_{\text{Bi}}[\alpha] + \mu_{\text{Bs}}[\alpha]X, \exp(\sigma'_{\text{Bi}}[\alpha] + \sigma'_{\text{Bs}}[\alpha]X)) \quad (13),$$

428 while Equation 11 was replaced by

$$429 \quad E_{\alpha\beta}[n, p] \sim f_{\text{norm}}(\mu_{\text{Ei}}[p] + \mu_{\text{Es}}[p]X, \exp(\sigma'_{\text{Ei}}[p] + \sigma'_{\text{Es}}[p]X)) \quad (14).$$

430 Exponentiation in scale is to make the s.d. positive while  $\sigma'_{\text{Bi}}$ ,  $\sigma'_{\text{Bs}}$ ,  $\sigma'_{\text{Ei}}$ , and  $\sigma'_{\text{Es}}$  are  
431 random variables without constraints. We did not consider scale's explanatory variables  
432 in WAIC comparing terms because the Markov chain simulation failed to converge in  
433 many cases. All statistical computation was performed in the software environment R  
434 ver. 3.5.1 [37], where Stan codes were compiled and executed by the R package "rstan"  
435 [38]. All source codes and data are available from the Figshare repository [39].

436

437

438

### Acknowledgments

439

440 We thank Mr. Keita Harada in Shirahama Aquarium, Kyoto University, for sending us  
441 the fresh individuals of brittle stars from the aquarium. We are grateful to the member

442 of Stan Community (<https://mc-stan.org/community/>) for suggesting better methods of  
443 statistical modeling. This work was partly supported by JSPS KAKENHI (Grant  
444 Number 16KT0099) and by JST CREST (Grant Number JPMJCR14D5), Japan.

445

446

#### 447 **Competing Interests**

448

449 The authors declare no competing interests.

450

451

#### 452 **References**

453

- 454 1. Boffi, E. (1972). Ecological aspects of ophiuroids from the phytal of SW Atlantic  
455 Ocean warm waters. *Mar. Biol.* 15, 316–328.
- 456 2. Mladenov, P. V., Emson, R. H., Colpit, L. V., and Wilkie, I. C. (1983). Asexual  
457 reproduction in the West Indian brittle star *Ophiocomella ophiactoides* (H.L. Clark)  
458 (Echinodermata: Ophiuroidea). *J. Exp. Mar. Biol. Ecol.* 72, 1–23.
- 459 3. Mladenov, P. V., and Emson, R. H. (1984). Divide and broadcast: sexual  
460 reproduction in the West Indian brittle star *Ophiocomella ophiactoides* and its  
461 relationship to fissiparity. *Mar. Biol.* 81, 273–282.
- 462 4. Romanes, G. J., and Ewart, J. C. (1881). Observations on the locomotor system of  
463 Echinodermata. *Philos. T. R. Soc. Lond.* 172, 829–885.
- 464 5. Preyer, W. T. (1887). *Die Bewegungen der Seesterne* (Berlin: Friedländer).
- 465 6. von Uexküll, J. (1905). Studien über den tonus II: die bewegungen der  
466 schlangensterne. *Z. Biol.* 46, 1–37.
- 467 7. Glaser, O. C. (1907). Movement and problem solving in *Ophiura brevispina*. *J.*  
468 *Exp. Zool.* 4, 203–220.
- 469 8. Arshavskii, Yu. I., Kashin, S. M., Litvinova, N. M., Orlovskii, G. N., and Fel'dman,  
470 A. G. (1976). Types of locomotion in ophiurans. *Neurophysiology* 8, 398–404.
- 471 9. Arshavskii, Yu. I., Kashin, S. M., Litvinova, N. M., Orlovskii, G. N., and Fel'dman,  
472 A. G. (1976). Coordination of arm movement during locomotion in ophiurans.  
473 *Neurophysiology* 8, 404–410.



- 474 10. Clark, E. G., Kanauchi, D., Kano, T., Aonuma, H., Briggs, D. E., and Ishiguro, A.  
475 (2019). The function of the ophiuroid nerve ring: how a decentralized nervous  
476 system controls coordinated locomotion. *J. Exp. Biol.* 222, jeb192104.
- 477 11. Astley, H. C. (2012). Getting around when you're round: quantitative analysis of  
478 the locomotion of the blunt-spined brittle star, *Ophiocoma echinata*. *J. Exp. Biol.*  
479 215, 1923–1929.
- 480 12. Kano, T., Sato, E., Ono, T., Aonuma, H., Matsuzaka, Y., and Ishiguro, A. (2017). A  
481 brittle star-like robot capable of immediately adapting to unexpected physical  
482 damage. *Roy. Soc. Open. Sci.* 4, 171200.
- 483 13. Tukey, J. W. (1977). *Exploratory Data Analysis* (Reading: Addison-Wesley).
- 484 14. Gelman, A. (2004). Exploratory data analysis for complex models. *J. Comput.*  
485 *Graph. Stat.* 13, 755–779.
- 486 15. Watanabe, W., Kano, T., Suzuki, S., and Ishiguro, A. (2011). A decentralized  
487 control scheme for orchestrating versatile arm movements in ophiuroid  
488 omnidirectional locomotion. *J. R. Soc. Interface* 9, 102–109.
- 489 16. Yee, A., Burkhardt, J., and Gilly, W. F. (1987). Mobilization of a coordinated  
490 escape response by giant axons in the ophiuroid, *Ophiopteris papillosa*. *J. Exp.*  
491 *Biol.* 128, 287–305.
- 492 17. Cowles, R. P. (1910). Stimuli produced by light and by contact with solid walls as  
493 factors in the behavior of ophiuroids. *J. Exp. Zool.* 9, 387–416.
- 494 18. Matsuzaka, Y., Sato, E., Kano, T., Aonuma, H., and Ishiguro, A. (2017). Non-  
495 centralized and functionally localized nervous system of ophiuroids: evidence from  
496 topical anesthetic experiments. *Biol. Open* 6, 425–438.
- 497 19. Paul, C. R. C., and Smith, A. B. (1984). The early radiation and phylogeny of  
498 echinoderms. *Biol. Rev.* 59, 443–481.
- 499 20. Sumrall, C. D., and Wray, G. A. (2007). Ontogeny in the fossil record:  
500 diversification of body plans and the evolution of “aberrant” symmetry in Paleozoic  
501 echinoderms. *Paleobiology* 33, 149–163.
- 502 21. Cobb, J. L., and Stubbs, T. R. (1981). The giant neurone system in ophiuroids I: the  
503 general morphology of the radial nerve cords and circumoral nerve ring. *Cell Tissue*  
504 *Res.* 219, 197–207.
- 505 22. Cobb, J. L., and Stubbs, T. R. (1982). The giant neurone system in ophiuroids III:

- 506 the detailed connections of the circumoral nerve ring. *Cell Tissue Res.* 226, 675–  
507 687.
- 508 23. Ghyoot, M., Cobb, J. L. S., and Thorndyke, M. C. (1994). Localization of  
509 neuropeptides in the nervous system of the brittle star *Ophiura ophiura*. *Phylos. T.*  
510 *Roy. Soc. B* 346, 433–444.
- 511 24. Bremaeker, N. D., Deheyn, D., Thorndyke, M. C., Baguet, F., and Mallefet, J.  
512 (1997). Localization of S1- and S2-like immunoreactivity in the nervous system of  
513 the brittle star *Amphipholis squamata* (Delle Chiaje 1828). *P. Roy. Soc. Lond. B*  
514 *Bio.* 264, 667–674.
- 515 25. Zueva, O., Khoury, M., Heinzeller, T., Mashanova, D., and Mashanov, V. (2018).  
516 The complex simplicity of the brittle star nervous system. *Front. Zool.* 15, 1.
- 517 26. Mangold, E. (1909). Studien zur physiologie des nervensystems der echinodermen.  
518 *Pflug. Arch. Eur. J. Phy.* 126, 371–406.
- 519 27. Diebschlag, E. (1938). Ganzheitliches verhalten und lernen bei echinodermen. *Z.*  
520 *Vergl. Physiol.* 25, 612–654.
- 521 28. Suzuki, R., Katsuno, I., and Matano, K. (1971). Dynamics of “neuron ring”.  
522 *Kybernetik* 8, 39–45.
- 523 29. Matsuoka, K. (1985). Sustained oscillations generated by mutually inhibiting  
524 neurons with adaptation. *Biol. Cybern.* 52, 367–376.
- 525 30. Owaki, D., Kano, T., Nagasawa, K., Tero, A., and Ishiguro, A. (2013). Simple  
526 robot suggests physical interlimb communication is essential for quadruped  
527 walking. *J. R. Soc. Interface* 10, 20120669.
- 528 31. Owaki, D., and Ishiguro, A. (2017). A quadruped robot exhibiting spontaneous gait  
529 transitions from walking to trotting to galloping. *Sci. Rep.* 7, 277.
- 530 32. Warner, G. F. (1971). On the ecology of a dense bed of the brittle-star *Ophiothrix*  
531 *fragilis*. *J. Mar. Biol. Assoc. U.K.* 51, 267–282.
- 532 33. Hoffman, M. D., and Gelman, A. (2014). The No-U-Turn sampler: adaptively  
533 setting path lengths in Hamiltonian Monte Carlo. *J. Mach. Learn. Res.* 15, 1593–  
534 1623.
- 535 34. Gelman, A., Stern, H. S., Carlin, J. B., Dunson, D. B., Vehtari, A., and Rubin, D. B.  
536 (2013). *Bayesian Data Analysis, Third Edition* (Florida: CPC Press).
- 537 35. Watanabe, S. (2009). *Algebraic Geometry and Statistical Learning Theory*

- 538 (Cambridge: Cambridge University Press).
- 539 36. Watanabe, S. (2010). Asymptotic equivalence of Bayes cross validation and widely  
540 applicable information criterion in singular learning theory. *J. Mach. Learn. Res.*  
541 11, 3571–3594.
- 542 37. R Core Team (2018). R: a language and environment for statistical computing.  
543 <https://www.R-project.org> (accessed 15 November 2018).
- 544 38. Stan Development Team (2018). Stan modeling language users guide and reference  
545 manual, version 2.18.0. <http://mc-stan.org> (accessed 15 November 2018).
- 546 39. Wakita, D., Kagaya, K., and Aonuma, H. (2019). Data and codes of "Generalized  
547 locomotion of brittle stars with an arbitrary number of arms". Figshare.  
548 <https://doi.org/10.6084/m9.figshare.8019827.v2> (deposited 23 April 2019).
- 549

## Figures

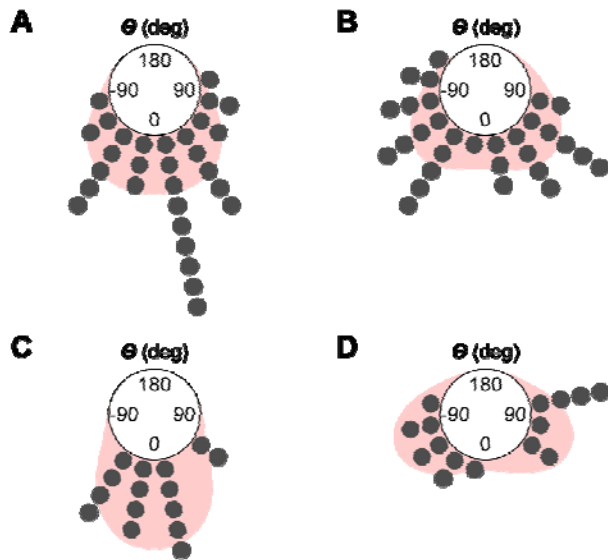

**Figure 1. Circular plots of moving direction after mechanical stimuli in the brittle star *Ophiactis brachyaspis*.** A: five-armed case (10 individuals, 30 trials). B: six-armed case (10 individuals, 30 trials). C: four-armed case (one individual, 15 trials). D: seven-armed case (one individual, 15 trials). The moving direction  $\theta$  is the measured angle based on the position of a mechanically stimulated arm (c.f. Figures S2, S3).  $\theta$  is 0 deg when the disk moves in the opposite direction of the stimulated arm, and is negative/positive when the disk movement is angled clockwise/anticlockwise, respectively, from the 0 deg. Each point represents  $\theta$  in each trial, which is grouped in a bin divided per 22.5 deg. Density plots on the background represent predictive distributions on the assumption of two symmetrical von Mises distributions.

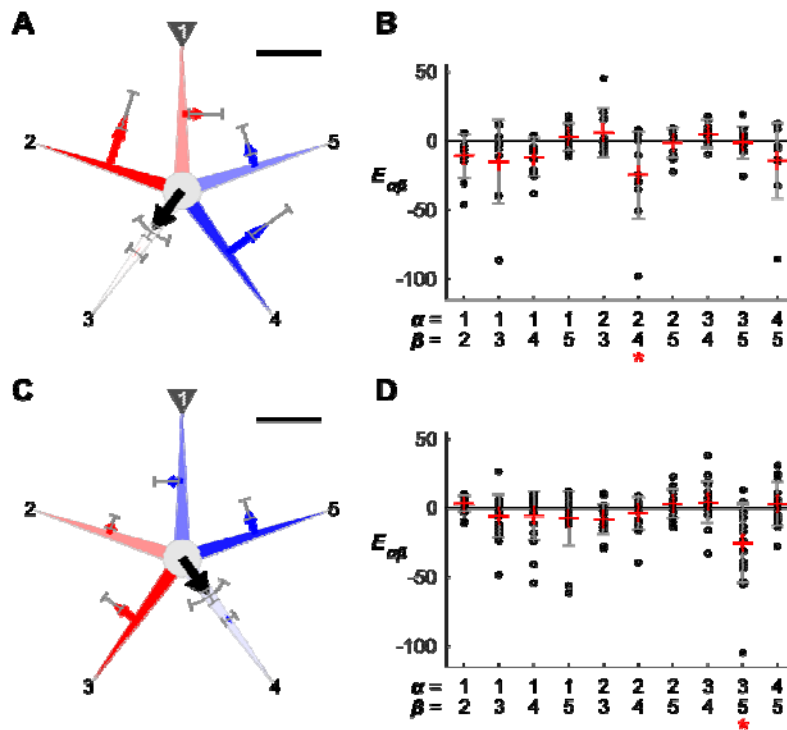

**Figure 2. Five-armed locomotion grouped by moving direction in the brittle star *Ophiactis brachyaspis*.** A,B: case where moving direction ( $\theta$ ; c.f. Figures S2, S3) is angled clockwise from the opposite direction of the stimulated arm, i.e.  $\theta$  is negative and  $\theta_{\text{sign}} = 0$  (eight individuals, 11 trials). C,D: case where  $\theta$  is positive (angled clockwise), i.e.  $\theta_{\text{sign}} = 1$  (10 individuals, 19 trials); an exemplary locomotion in this case is shown in Video S1. A,C: schematized brittle stars reflecting the resultant quantitative values. Black arrows at the disks represent the measured means of moving distance ( $S$ ; c.f. Figure S2) by length and the measured means of  $\theta$  by angle. Error bars parallel to the disks' arrows show  $S$ 's standard deviation (s.d.) and arc-shaped error bars represent  $\theta$ 's s.d. in data. The blue or red arrow at each arm represents the degree of being a left or right rower ( $B_\alpha$ ; c.f. Figures S2, S3), reflecting the absolute median of each posterior mean by arrow length and the median of each posterior s.d. by error bars. When a posterior mean was negative/positive, its blue-leftward/red-rightward arrow extends from its arm, indicating that the arm pushed leftward/rightward (anticlockwise/clockwise), respectively. In each panel, the arm with the maximum absolute value in posterior mean is colored with the most vivid blue/red, while the other arms show lighter blue/red corresponding to the relative values to the maximum. Scale

bars represent 40 mm for  $S$  and 50 for  $B_\alpha$ . B,D: degree of synchronization between two arms ( $E_{\alpha\beta}$  for the  $\alpha$ - and  $\beta$ -th arms). Small circles represent measured values. Pair-by-pair red pluses indicate the medians of posterior means while error bars show the medians of posterior s.d. parameters. Negative/positive values represent that the paired movement of the  $\alpha$ - and  $\beta$ -th arms synchronized in the opposite/same direction, respectively. Each asterisk indicates the pair with the negatively largest estimated mean, showing remarkable antiphase synchronization. All posterior distributions for both  $B_\alpha$  and  $E_{\alpha\beta}$  were estimated under a better performed model in terms of WAIC, where  $\Theta_{\text{sign}}$  is an explanatory variable for the mean and s.d.

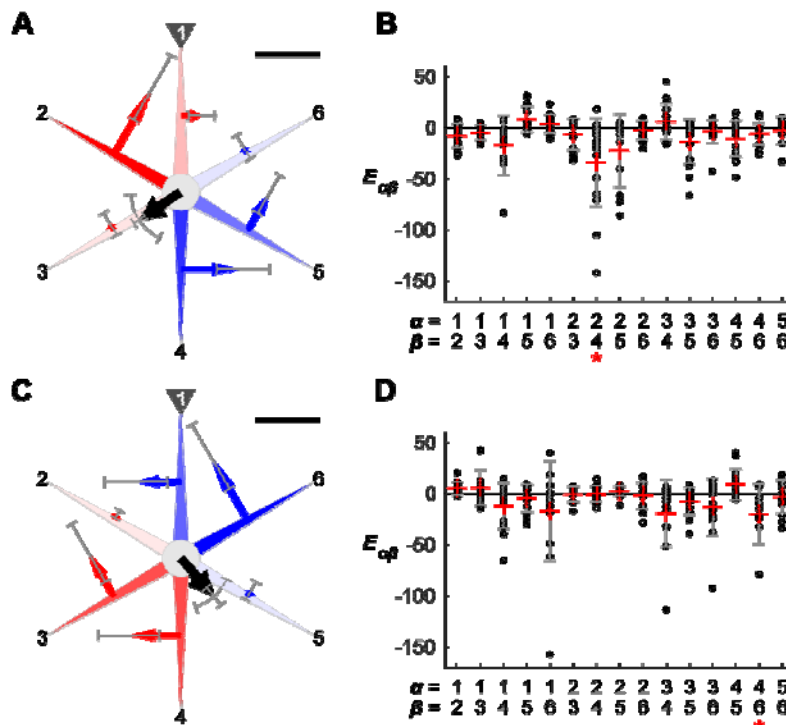

**Figure 3. Six-armed locomotion grouped by moving direction in the brittle star *Ophiactis brachyaspis*.** A,B: case where  $\Theta_{\text{sign}} = 0$  (eight individuals, 16 trials). C,D: case where  $\Theta_{\text{sign}} = 1$  (eight individuals, 14 trials); an exemplary locomotion in this case is shown in Video S2. A,C: schematized brittle stars reflecting the resultant quantitative values, as explained in Figure 2. B,D: degree of synchronization between two arms ( $E_{\alpha\beta}$  for the  $\alpha$ - and  $\beta$ -th arms), as explained in Figure 2.

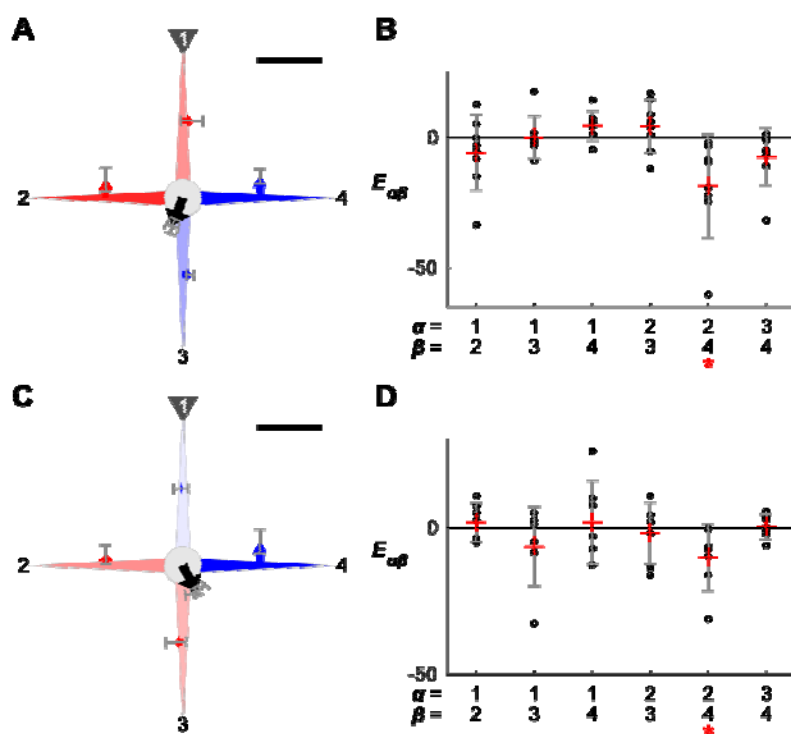

**Figure 4. Four-armed locomotion grouped by moving direction in the brittle star *Ophiactis brachyaspis*.** A,B: case where  $\Theta_{\text{sign}} = 0$  (one individuals, eight trials). C,D: case where  $\Theta_{\text{sign}} = 1$  (one individuals, seven trials). A,C: schematized brittle stars reflecting the resultant quantitative values, as explained in Figure 2. B,D: degree of synchronization between two arms ( $E_{\alpha\beta}$  for the  $\alpha$ - and  $\beta$ -th arms), as explained in Figure 2.

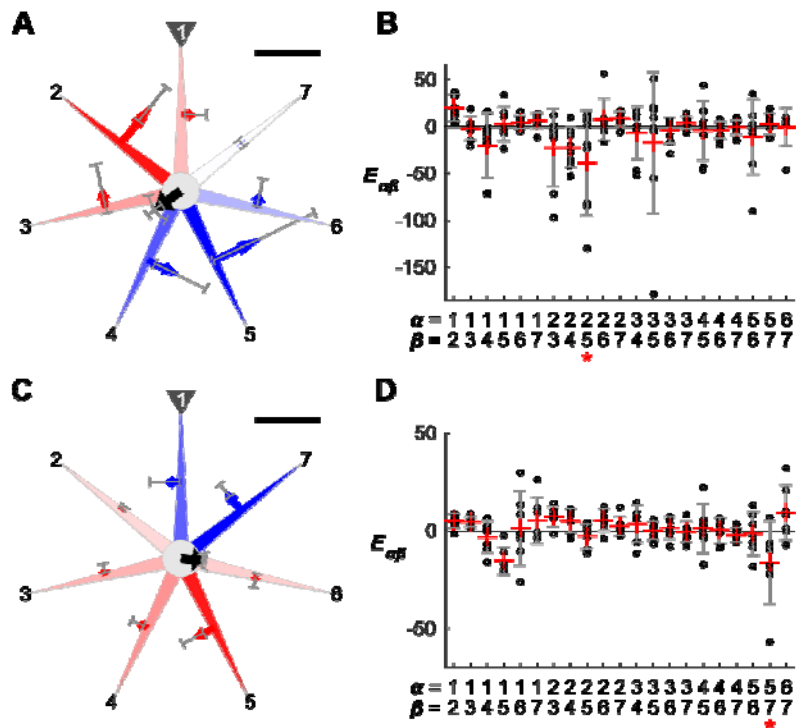

**Figure 5. Seven-armed locomotion grouped by moving direction in the brittle star *Ophiactis brachyaspis*.** A,B: case where  $\Theta_{\text{sign}} = 0$  (one individuals, eight trials). C,D: case where  $\Theta_{\text{sign}} = 1$  (one individuals, seven trials). A,C: schematized brittle stars reflecting the resultant quantitative values, as explained in Figure 2. B,D: degree of synchronization between two arms ( $E_{opt}$  for the  $\alpha$ - and  $\beta$ -th arms), as explained in Figure 2.

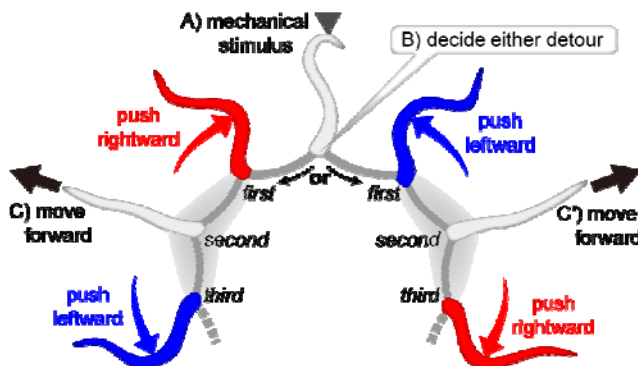

**Figure 6. Model of how a mechanical stimulus makes arm-by-arm locomotive movements in brittle stars with an arbitrary number of arms.** The stimulated arm makes an afferent signal—(A)—which chiefly transfers in either of the clockwise or



anticlockwise detour through inter-arm connections made by neurons and/or other physical properties. Which detour the signal dominates is determined by some perturbation—(B). Subsequently, one of the *first* neighboring arms to the stimulated arm pushes actively in the stimulus direction, while the *third* neighbor in the same detour pushes oppositely to the *first*. As a result, the *second* arm between the *first* and *third* faces forward in behavioral terms—(C) or (C').

## Tables

**Table 1. WAICs of statistical models for  $\Theta$ ,  $B_\alpha$ , and  $E_{\alpha\beta}$ .**

| Model             | Specification                     |                            | Four-armed |       |           | Five-armed |       |           | Six-armed |       |           | Seven-armed |       |           |
|-------------------|-----------------------------------|----------------------------|------------|-------|-----------|------------|-------|-----------|-----------|-------|-----------|-------------|-------|-----------|
|                   |                                   |                            | Rank       | WAIC  | $\Delta$  | Rank       | WAIC  | $\Delta$  | Rank      | WAIC  | $\Delta$  | Rank        | WAIC  | $\Delta$  |
| $\Theta$          | Distribution number               |                            |            |       |           |            |       |           |           |       |           |             |       |           |
| 1                 | one                               |                            | 2          | 0.876 | 0.917     | 2          | 1.192 | 0.764     | 2         | 1.518 | 5.55      | 2           | 1.860 | 10.7      |
| 2                 | two                               |                            | 1          | 0.845 | <b>0*</b> | 1          | 1.179 | <b>0*</b> | 1         | 1.425 | <b>0*</b> | 1           | 1.502 | <b>0*</b> |
| $B_\alpha$        | Explanatory variable <sup>†</sup> | Individuality <sup>†</sup> |            |       |           |            |       |           |           |       |           |             |       |           |
| 1                 | no                                | no                         | 3          | 4.217 | 4.94      | 8          | 4.671 | 60.4      | 5         | 5.338 | 58.9      | 4           | 4.940 | 25.7      |
| 2                 | no                                | yes                        | —          | —     | —         | 9          | 4.676 | 61.9      | 10        | 5.352 | 64.0      | —           | —     | —         |
| 3                 | $L_\alpha$                        | no                         | 1          | 4.176 | <b>0*</b> | 10         | 4.679 | 62.9      | 9         | 5.350 | 63.2      | 5           | 4.947 | 27.1      |
| 4                 | $L_\alpha$                        | yes                        | —          | —     | —         | 12         | 4.688 | 65.4      | 12        | 5.382 | 74.9      | —           | —     | —         |
| 5                 | $S$                               | no                         | 5          | 4.267 | 10.9      | 7          | 4.670 | 60.3      | 7         | 5.338 | 59.2      | 3           | 4.938 | 25.2      |
| 6                 | $S$                               | yes                        | —          | —     | —         | 11         | 4.680 | 63.1      | 11        | 5.360 | 67.0      | —           | —     | —         |
| 7                 | $\Theta$                          | no                         | 2          | 4.187 | 1.29      | 1          | 4.469 | <b>0*</b> | 2         | 5.191 | 6.25      | 2           | 4.827 | 2.03      |
| 8                 | $\Theta$                          | yes                        | —          | —     | —         | 2          | 4.477 | 2.16      | 4         | 5.208 | 12.2      | —           | —     | —         |
| 9                 | $\Theta_{\text{sign}}$            | no                         | 4          | 4.230 | 6.41      | 3          | 4.501 | 9.43      | 1         | 5.174 | <b>0*</b> | 1           | 4.818 | <b>0*</b> |
| 10                | $\Theta_{\text{sign}}$            | yes                        | —          | —     | —         | 4          | 4.505 | 10.8      | 3         | 5.193 | 6.89      | —           | —     | —         |
| 11                | $F_\alpha$                        | no                         | 6          | 4.271 | 11.3      | 5          | 4.640 | 51.0      | 6         | 5.338 | 59.1      | 6           | 4.955 | 28.8      |
| 12                | $F_\alpha$                        | yes                        | —          | —     | —         | 6          | 4.644 | 52.3      | 8         | 5.347 | 62.4      | —           | —     | —         |
| $E_{\alpha\beta}$ | Explanatory variable <sup>†</sup> |                            |            |       |           |            |       |           |           |       |           |             |       |           |
| 1                 | no                                |                            | 1          | 3.951 | <b>0*</b> | 4          | 4.327 | 25.6      | 4         | 4.440 | 42.0      | 3           | 4.294 | 9.30      |
| 2                 | $S$                               |                            | 4          | 3.974 | 4.14      | 3          | 4.321 | 22.0      | 2         | 4.413 | 17.5      | 4           | 4.320 | 25.7      |
| 3                 | $\Theta$                          |                            | 2          | 3.953 | 0.365     | 2          | 4.292 | 4.90      | 3         | 4.416 | 20.0      | 2           | 4.282 | 1.58      |
| 4                 | $\Theta_{\text{sign}}$            |                            | 3          | 3.959 | 1.45      | 1          | 4.284 | <b>0*</b> | 1         | 4.394 | <b>0*</b> | 1           | 4.279 | <b>0*</b> |

\* $\Delta = 0$ , bolded, indicating a best supportive model. <sup>†</sup>Not considered if “no”; otherwise, considered in the mean of normal distribution.

## Supplementary Information

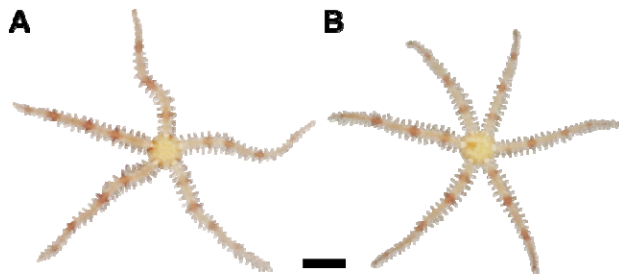

**Figure S1.** The fissiparous brittle star *Ophiactis brachyaspis*. A: a five-armed individual. B: a six-armed individual. The scale bar represents 2 mm.

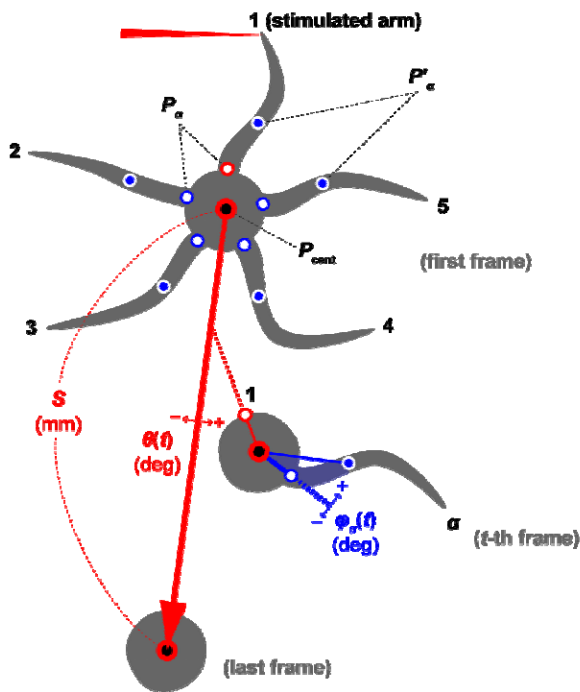

**Figure S2.** Measurements in the locomotion of the brittle star *Ophiactis brachyaspis*.

Schematic five-armed brittle stars are shown at the first ( $t = 1$ ),  $t$ -th, and last ( $t = 600$ ) frames as an example. Not all arms are shown except for the first frame. The arm index,  $\alpha$ , takes 1 to 5, where the stimulated arm is numbered 1. Blue-filled circles indicate the coordinate points of  $P'_\alpha(t)$  while open circles show those of  $P_\alpha(t)$ . Particularly,  $P_1(t)$  is indicated by red-lined open circles. The gravity of center of  $P_\alpha(t)$ , namely  $P_{\text{cent}}(t)$ , is represented by red-lined filled circles.  $\varphi_\alpha(t)$  is the arm angle made by  $P_\alpha(t)$ ,  $P_{\text{cent}}(t)$ , and

$P'_\alpha(t)$ .  $\theta(t)$  is the angle made by the segment  $P_{\text{cent}}(1)P_{\text{cent}}(600)$  and the segment  $P_1(t)P_{\text{cent}}(t)$ , representing the direction of the stimulated arm compared to moving direction. The moving distance  $S$  corresponds to the length of the segment  $P_{\text{cent}}(1)P_{\text{cent}}(600)$ .

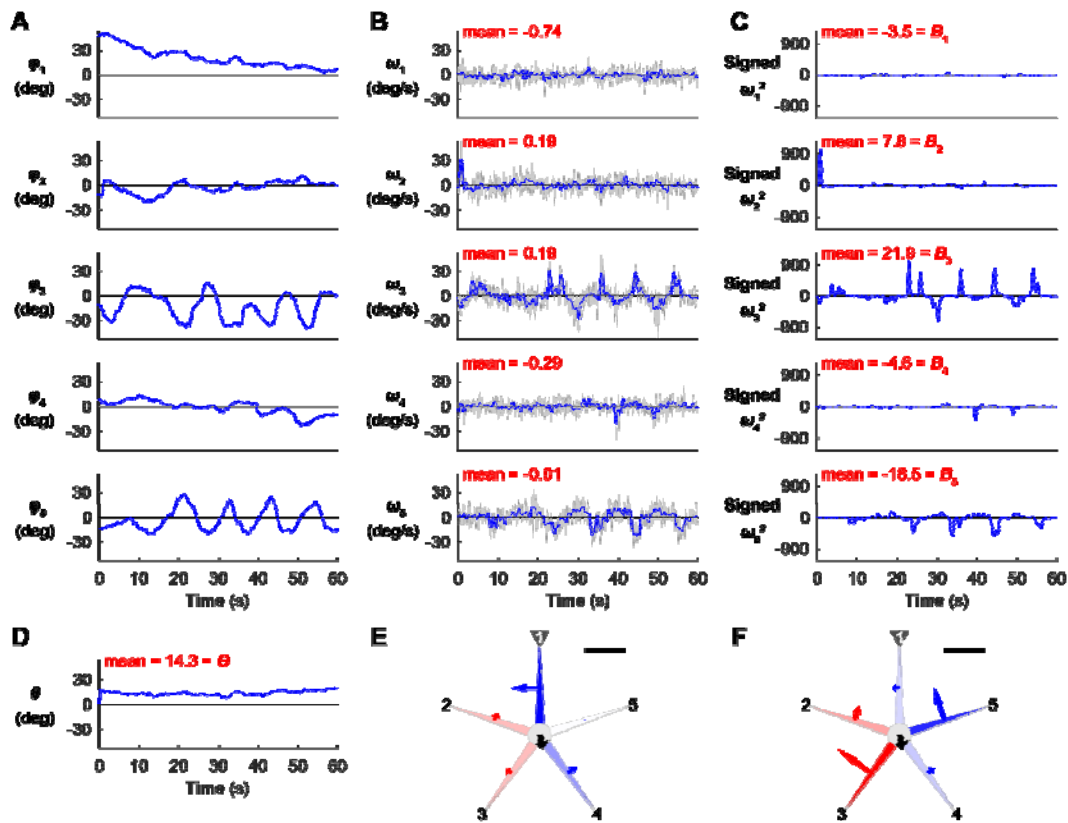

**Figure S3. Calculation and visualization in a five-armed example of the locomotion of the brittle star *Ophiactis brachyaspis*.** A: temporal change of  $\varphi_\alpha(t)$  deg (c.f. Figure S2). B: temporal change of  $\omega_\alpha(t)$  deg/s—angular velocity of  $\varphi_\alpha(t)$ . Background gray plots represent the original data while thicker blue plots show low-pass filtered data. Each plot’s “mean” shows the mean value of the filtered  $\omega_\alpha(t)$  for  $t = 1, \dots, 600$ . C: temporal change of signed  $\omega_\alpha(t)^2$ . Each plots’ “mean” shows its mean value for  $t = 1, \dots, 600$ , corresponding to  $B_\alpha$ —the degree of being a left or right rower in the  $\alpha$ -th arm. D: temporal change of  $\theta(t)$  deg (c.f. Figure S2). The “mean” shows its mean value for  $t = 1, \dots, 600$ , corresponding to  $\Theta$  (deg)—moving direction. E: schematized brittle star reflecting the mean  $\omega_\alpha(t)$  calculated in B and  $\Theta$  in D. F: schematized brittle star

reflecting  $B_\alpha$  in C and  $\theta$  in D. In E and F, each gray arrowhead indicates the stimulated arm numbered 1, with the number followed anticlockwise in order. The angles of black arrows at the disks represent  $\theta$ . An arm with a negative/positive mean value extends a blue-leftward/red-rightward arrow, respectively, with its length corresponding to the absolute value of its mean. Compared to the mean values of the original  $\omega_\alpha(t)$  in E,  $B_\alpha$  in F well explains actual locomotion (c.f. Video S1). Note that  $B_\alpha$  originally reflects a returning direction by its sign (positive  $B_\alpha$  denotes anticlockwise returning), but its schematized arrow here indicates a ‘pushing direction’ for simply imagining force to the ground (positive  $B_\alpha$  denotes clockwise pushing, so apparently opposing the sign in Figure S2). Scale bars represent 1.0 for the mean  $\omega_\alpha(t)$  in E and 20 for  $B_\alpha$  in F.

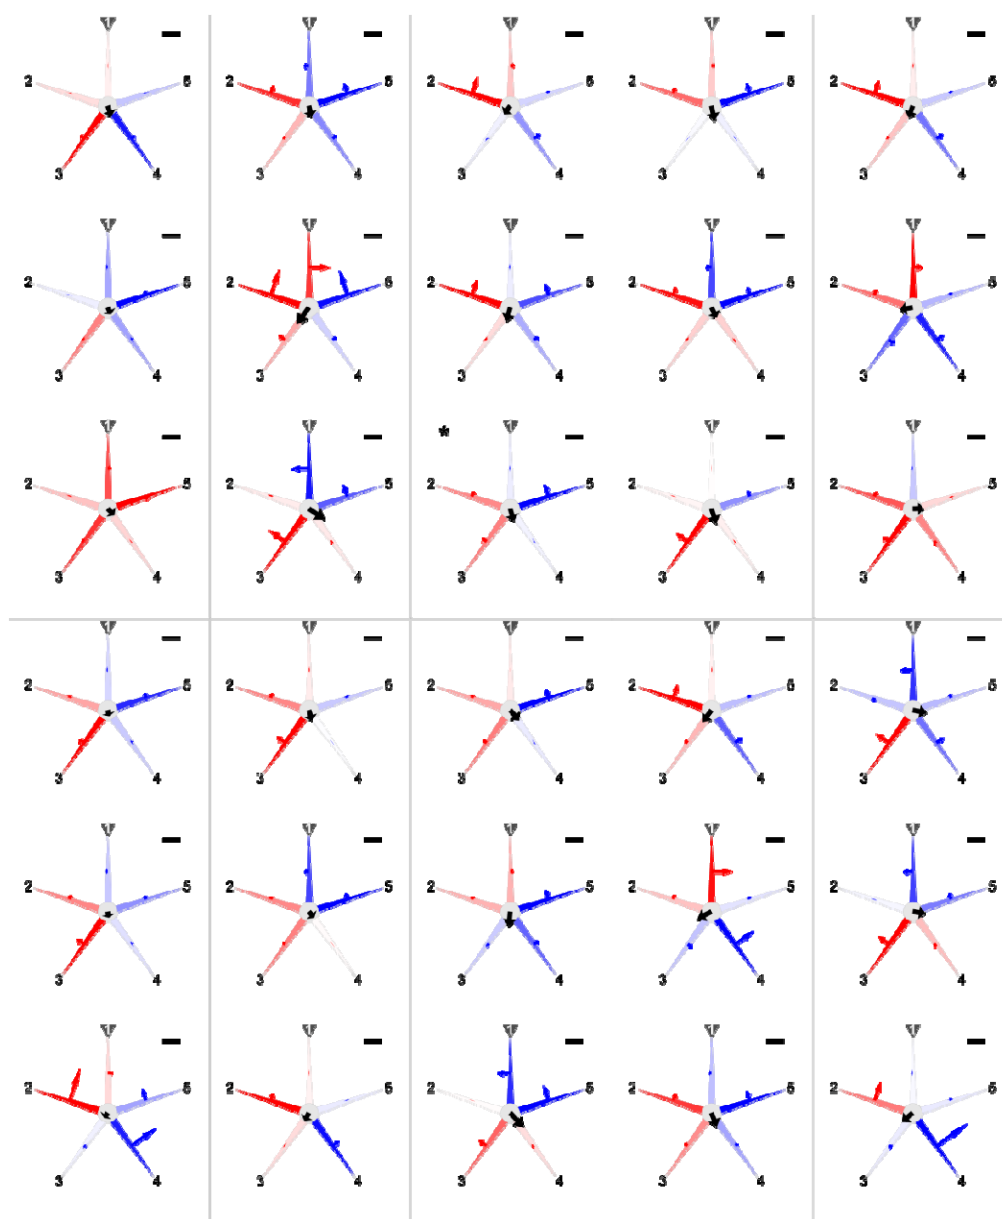

**Figure S4. Five-armed trial-by-trial locomotion in the brittle star *Ophiactis brachyaspis*.** Three trials were obtained from each of 10 individuals, which are partitioned by gray lines. Black arrows at the disks represent moving distance ( $S$ ; c.f. Figure S2) by length and moving direction ( $\Theta$ ; c.f. Figures S2, S3) by angle. An arm with a negative/positive value for the degree of being a left or right rower ( $B_\alpha$ ; c.f. Figures S2, S3) extends a blue-leftward/red-rightward arrow, respectively, with its length corresponding to  $|B_\alpha|$ . In each panel, the arm with the maximum  $|B_\alpha|$  is colored

with the most vivid blue/red, while the other arms show lighter blue/red corresponding to the relative values to the maximum. Scale bars represent 20 mm for  $S$  and 50 for  $B_{\alpha}$ . The asterisked trial (row 3, column 3) is shown in Video S1.

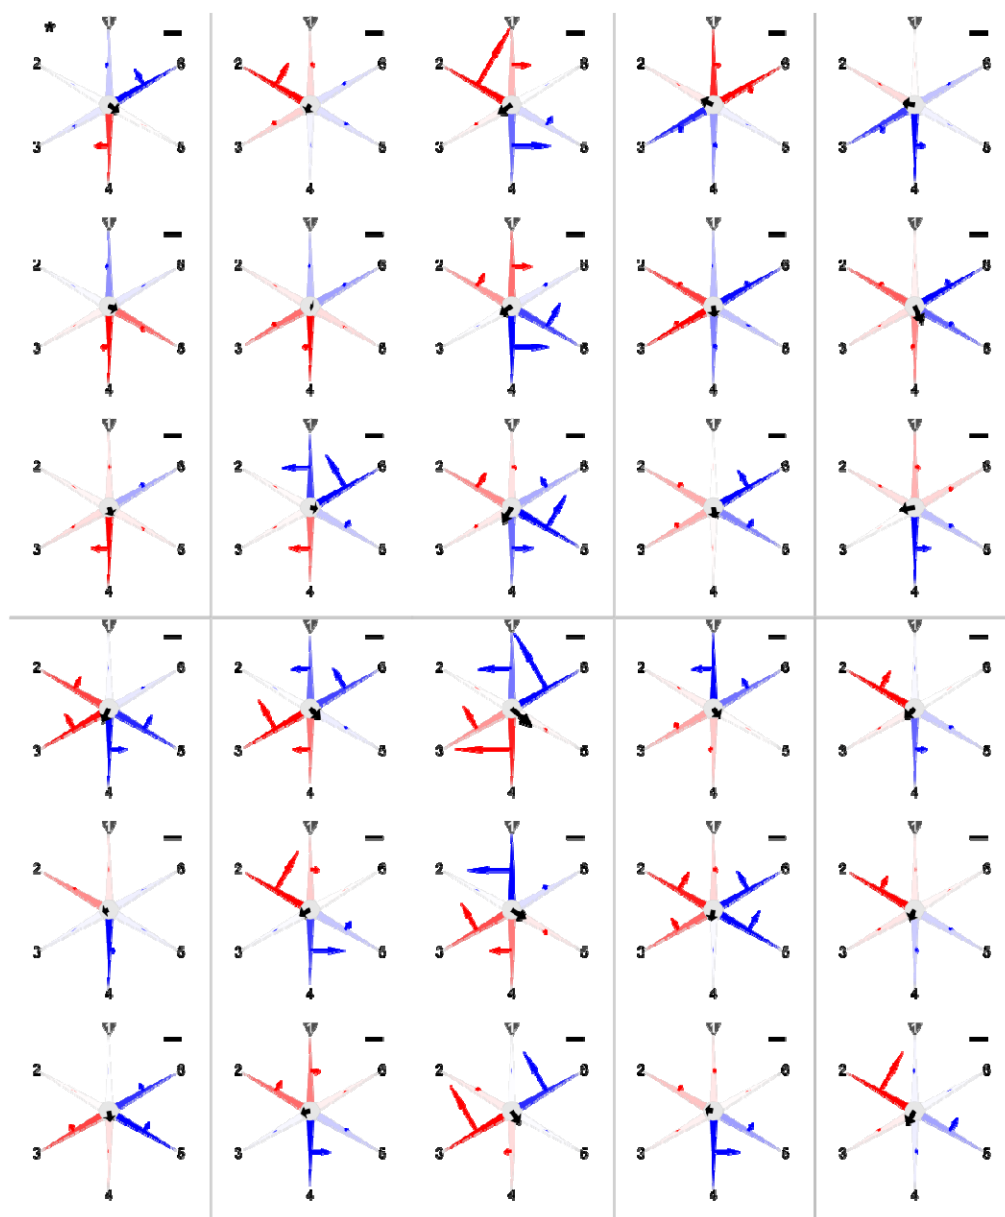

**Figure S5. Six-armed trial-by-trial locomotion in the brittle star *Ophiactis brachyaspis*.** Three trials were obtained from each of 10 individuals, which are partitioned by gray lines. Results are shown as in Figure S4. The asterisked trial (row 1,

column 1) is shown in Video S2.

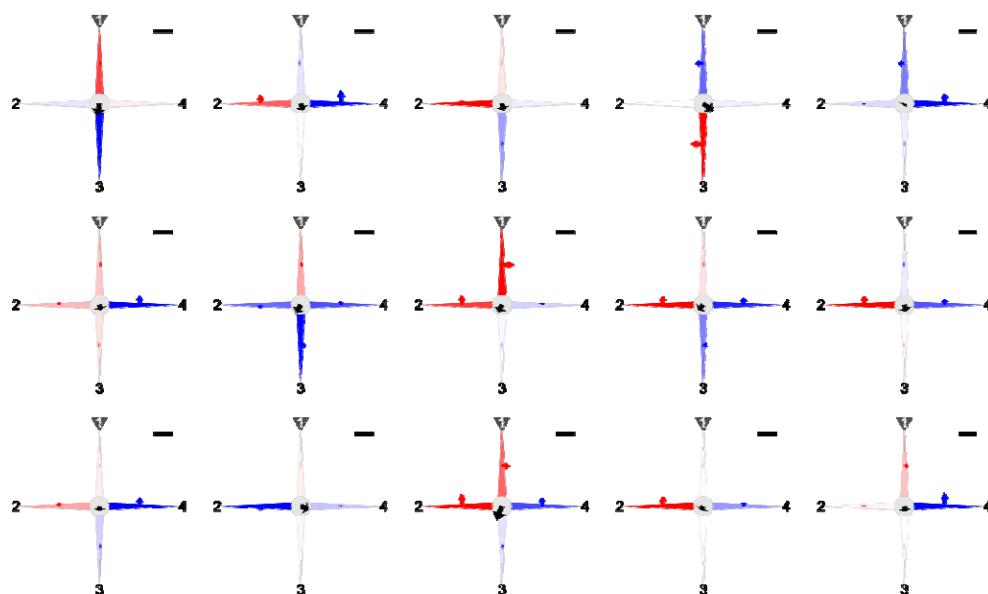

**Figure S6. Four-armed trial-by-trial locomotion in the brittle star *Ophiactis brachyaspis*.** Fifteen trials were obtained from one individual. Results are shown as in Figure S4.

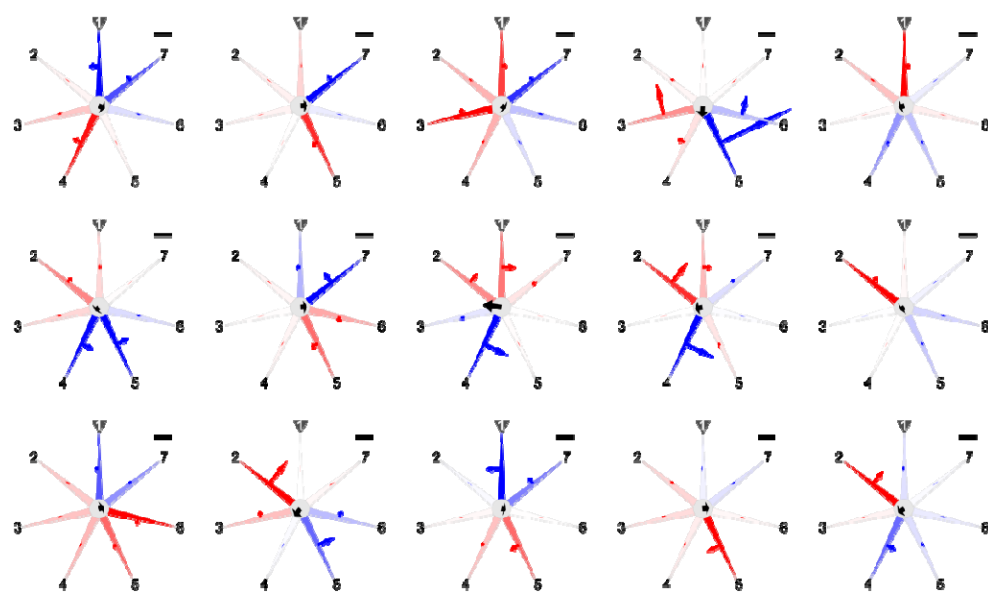

**Figure S7. Seven-armed trial-by-trial locomotion in the brittle star *Ophiactis***



***brachyaspis***. Fifteen trials were obtained from one individual. Results are shown as in Figure S4.

**Video S1. Locomotion of a five-armed individual of the brittle star *Ophiactis brachyaspis***. Quantitative analysis of this trial is presented in Figure S3. Resultant values are schematized at the asterisked panel in Figure S4.

**Video S2. Locomotion of a six-armed individual of the brittle star *Ophiactis brachyaspis***. Resultant values are schematized at the asterisked panel in Figure S5.
